# Supplementary material for: Optimal Control of Shigellosis with Cost-Effective Strategies
Source: Hindawi journal article supplement (doi:10.1155/2020/9732687), 2020-08-28
Supplement: f1 [file 9732687.f1.zip]

Table 8: Parameters and their description.

| Parameter    | Description                                                                                            | Value           | Source  |
|--------------|--------------------------------------------------------------------------------------------------------|-----------------|---------|
| $\Lambda$    | Rate of recruitment of individuals into the susceptible class                                          | 462 Humans/year | [10]    |
| $\beta_1$    | Transmission rate for infectious individuals                                                           | 0.4/year        | [10]    |
| $\beta_2$    | Transmission rates for carriers                                                                        | 0.6/year        | [10]    |
| $\phi$       | Effective transmission rate of <i>Shigellosis</i> due to environment to human interaction              | 0.4465/year     | [23]    |
| $\delta$     | Incubation rate (Rate at which exposed individuals, $E(t)$ progress to either class $I(t)$ or $C(t)$ ) | 0.35/day        | [27]    |
| $\mu_h$      | Natural human mortality rate                                                                           | 0.4465/year     | Assumed |
| $q$          | A fraction of exposed individuals, $E(t)$ who progress to class $I(t)$                                 | 0.9             | [8]     |
| $l$          | A fraction of carriers, $C(t)$ who recover naturally and progress to class $R(t)$                      | 0.4             | Assumed |
| $\alpha$     | Rate of screening carriers                                                                             | 0.56            | Assumed |
| $d_1$        | Disease induced death rate by $I(t)$                                                                   | 0.02 /year      | Assumed |
| $\eta_1$     | Recovery rate of infectious humans                                                                     | 0.14/day        | [8]     |
| $\eta_2$     | Recovery rate of carrier humans                                                                        | 0.0286/day      | [8]     |
| $K_p$        | The environmental carrying capacity for <i>Shigella</i> bacteria in the food or water supply           | $10^4$ cells/mL | Assumed |
| $K$          | Half saturation rate of <i>Shigella</i> bacteria that can cause a 50% chance of infection              | 60 cells/mL     | Assumed |
| $\epsilon_1$ | Bacteria shed rate into the water supply by infectious human                                           | 80 cells/mL/day | [26]    |
| $\epsilon_2$ | Bacteria shed rate into the water supply by carrier humans human                                       | 70 cells/mL/day | [26]    |
| $r$          | (Maximum) per capita growth rate of <i>Shigella</i> bacteria                                           | 0.73/day        | [25]    |
| $\mu_b$      | Mortality rate of <i>Shigella</i> bacteria, including phage degradation                                | 0.83/day        | Assumed |
| $\omega$     | Wanning rate of diseased induced immunity                                                              | 0.25 /year      | [8]     |
| $\sigma$     | Rate at which sanitation leads to death of <i>Shigella</i> bacteria                                    | 1.66/day        | [24]    |
| $\gamma$     | Treatment rate for infectious individuals(I)                                                           | 0.4/year        | Assumed |
| $\rho$       | Education efficacy parameter                                                                           | 0.6/year        | [25]    |
