# Supplementary material for: Optimal Control of Shigellosis with Cost-Effective Strategies
Source: Hindawi journal article supplement (doi:10.1155/2020/9732687), 2020-08-28
Supplement: f1 [file 9732687.f1.zip]

Table 9: State variables and their description.

| Variable       | Description                                             |
|----------------|---------------------------------------------------------|
| $S(t)$         | The number of susceptible humans at a time $t$ .        |
| $E(t)$         | The number of exposed humans at a time $t$ .            |
| $I(t)$         | The number of infectious humans at a time $t$ .         |
| $R(t)$         | The number of recovered (immune) humans at a time $t$ . |
| $C(t)$         | The number of carriers at a time $t$ .                  |
| $B(t)$         | The number of <i>Shigella</i> bacteria at a time $t$ .  |
| $\lambda_h(t)$ | Human-to-human transmission at time $t$ .               |
| $\lambda_h(t)$ | Environment-to-human transmission at time $t$ .         |
