# Supplementary material for: Optimal Control of Shigellosis with Cost-Effective Strategies
Source: Comput Math Methods Med. 2020 Aug 28;2020:9732687. doi: 10.1155/2020/9732687 (PMC7474761; doi:10.1155/2020/9732687)
Supplement: Supplementary Materials — Table 8: parameters and their description. Table 9: state variables and their description [23–27]. [file 9732687.f1.zip]

Archive with 2 entries (2 files):
- TABLE_ 8 _Parameters_Descrition_Values.pdf
- TABLE_9 _State Variables_Description.pdf
